# Supplementary material
Source: PubMed Central journal article supplement (PMC6319764)
Supplement: PRO-28-414-s001.pdf [file PRO-28-414-s001.pdf]

# Supplementary Information

## Probing the modularity of megasynthases by rational engineering of a fatty acid synthase (FAS) type I

Alexander Rittner, Karthik S. Paithankar, David Drexler, Aaron Himmler, and Martin Grininger\*

### Author affiliations

Institute of Organic Chemistry and Chemical Biology, Buchmann Institute for Molecular Life Sciences, Cluster of Excellence for Macromolecular Complexes, Goethe University Frankfurt, Max-von-Laue-Str. 15, 60438 Frankfurt am Main, Germany

### Correspondence

\*grininger@chemie.uni-frankfurt.de

### Table of contents:

#### Supplementary Figures:

Figure S1: Cloning of human FAS expression constructs in *E. coli*

Figure S2: Screening of expression conditions for human FAS in *E. coli*

Figure S3: Co-expression of hFAS with chaperones encoding genes

Figure S4: Expression of hFAS and mFAS constructs in large scale (1-2 L expression cultures)

Figure S5: Sequences of animal type I FAS

Figure S6: Deconstruction of the processing part of mFAS

Figure S7: Thermal shift assay

Figure S8: Confirmation of the oligomeric state of select constructs

Figure S9: Original pictures of relevant presented gels

#### Supplementary Tables

Table S1: List of plasmids

Table S2: List of primers

#### Supplementary Note

Expression of human FAS in *E. coli*

#### References

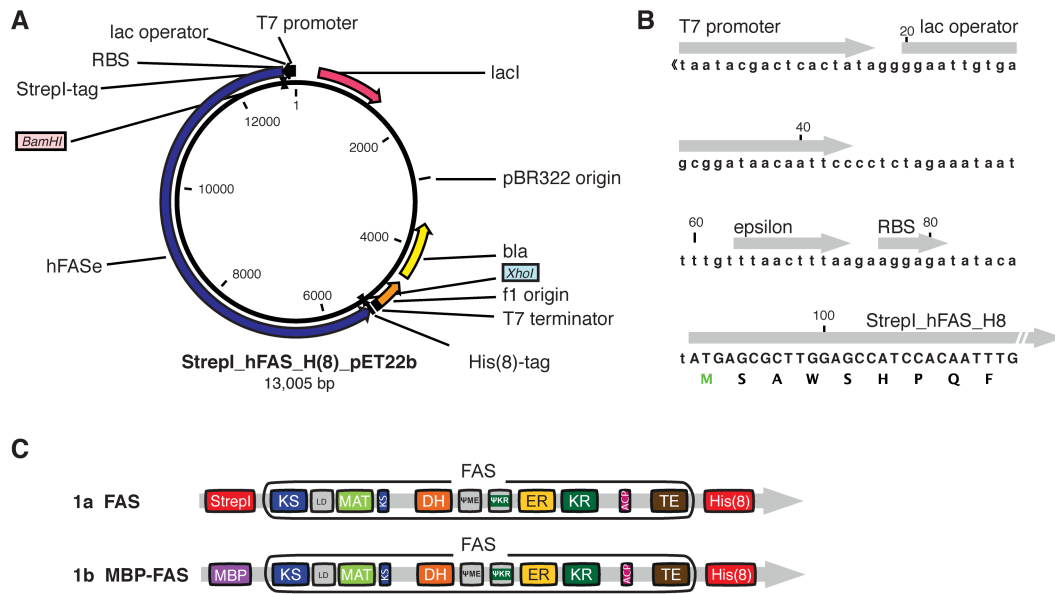

**Figure S1: Cloning of human FAS expression constructs in *E. coli*.** (A) Representative vector map of a pET22b derived expression vector generating N-terminally StrepI- and C-terminally His-tagged constructs. Abbreviations: lacI, Lac repressor protein; bla,  $\beta$ -lactamase; RBS, ribosome binding site. (B) Sequence of the 5' regulatory region of the multiple cloning site of pET22b and the 5' part of the N-terminally Strep-tagged hFAS. (C) Domain organization of FAS constructs containing different tags. Abbreviations as introduced in the main text. MBP, referring to the maltose binding protein, is fused to the N-terminus for increased protein solubility.

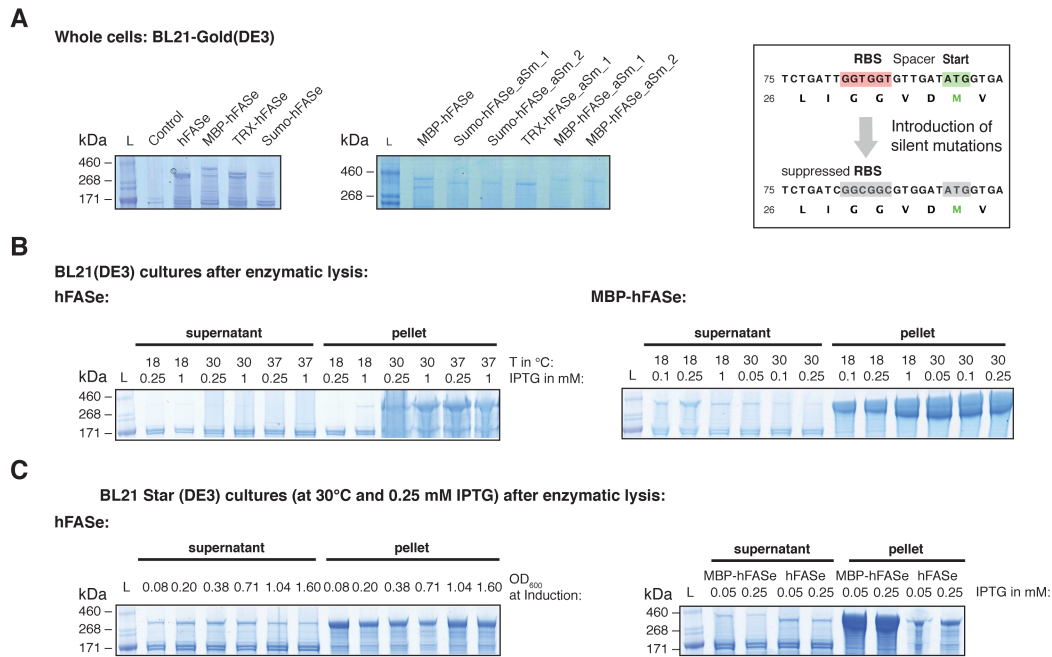

**Figure S2: Screening of expression conditions for human FAS in *E. coli*.** SDS-PAGE was performed with NuPage 4-12 % Bis-Tris gradient gels. The MBP-tag was used for increasing protein solubility. (A) Initial test-expressions of different fusion constructs of hFASe (hFAS expressed from a codon optimized gene for *E. coli*) in BL21-Gold(DE3) cells. Whole cells were loaded on the SDS-PAGE gel to analyze total expression yields (left and middle panels). Due to the appearance of a second band for all constructs, an alternative translation start was identified and suppressed by introducing silent mutations in the RBS (aSm; middle and right panel). The alternative start codon, referring to M32, is highlighted in green. (B) Influence of temperature and IPTG inducer concentrations on the expression of hFASe (left panel) and MBP-hFASe (right panel) in BL21(DE3). hFASe refers to a sequence optimized gene. Supernatants and pellets after centrifugation of enzymatically lysed cells were loaded. (C) Influence of the cell density at induction on the expression of hFASe (left panel) and MBP-hFASe (right panel) in BL21 Star (DE3) cells. Supernatants and pellets after centrifugation of enzymatically lysed cells were loaded.

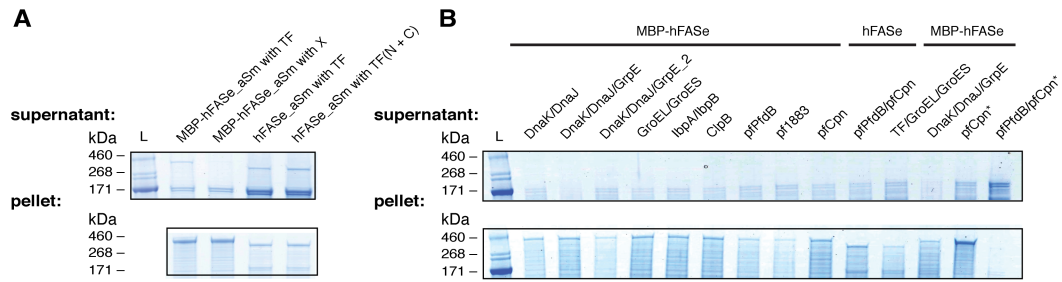

**Figure S3: Co-expression of hFAS with chaperones encoding genes.** SDS-PAGE was performed with NuPage 4-12 % Bis-Tris gradient gels. (A) Co-expression of MBP-hFASe and hFASe in BL21-Gold(DE3) cells with trigger factor (TF), truncated trigger factor (TF(N+C)) and a control dodecin (X). Coomassie-stained SDS-PAGE of the supernatant and pellet after enzymatic lysis of 50 mL cultures (4 h/30 °C) are shown. TF(N + C) refers to a truncated version containing the fused N- and C- terminal part of the TF. (B) Co-expression of MBP-hFASe and hFASe with various chaperones from *E. coli* and *P. furiosus* in BL21-Gold(DE3) cells. Coomassie-stained SDS-PAGE of the supernatant and pellet after enzymatic lysis of 50 mL cultures (4 h/30 °C) are shown. Asterisks indicates co-expression at 47 °C for potential activity of enzymes from *P. furiosus*.

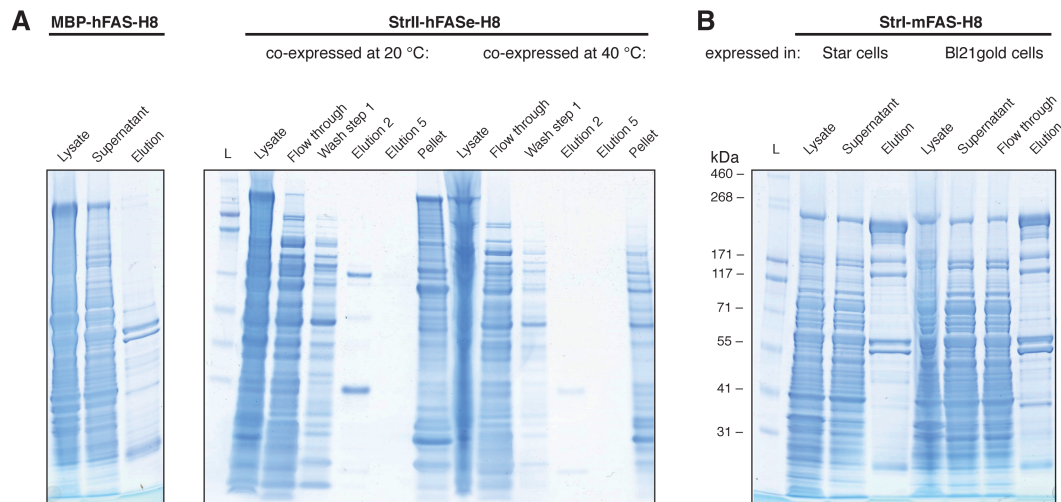

**Figure S4: Expression of MBP-hFAS, hFASe and mFAS constructs in large scale (1-2 L expression cultures).** (A) Expression of MBP-hFAS in a 2 L BL21-Gold(DE3) culture and co-expression of hFASe with chaperones (pfuPfdA, pfuPfdB and pfuCpn bearing a mutation to increase activity at lower temperatures)<sup>1</sup> in 1 L cultures at 20 °C and 40 °C. (B) Expression and purification of mFAS, expressed in 2 L cultures of BL21 Star (DE3) or BL21-Gold(DE3) cells. Coomassie-stained SDS-PAGE of the lysed cells (French press) and crudely purified protein (Ni-chelating affinity chromatography) is shown.

FAS\_MOUSE MEEVVIAGMSGKLEPESENLOEFWANLIGGVDMVTDDRRWKAGLYGLPKRSGKLDLKFDAFFGVHPKQOAHMTDPLRLLLLEVSYEAI VDDGINPASL 100  
FAS\_RAT MEEVVIAGMSGKLEPESENLOEFWANLIGGVDMVTDDRRWKAGLYGLPKRSGKLDLKFDAFFGVHPKQOAHMTDPLRLLLLEVSYEAI VDDGINPASL 100  
FAS\_HUMAN MEEVVIAGMSGKLEPESENLOEFWANLIGGVDMVTDDRRWKAGLYGLPKRSGKLDLKFDAFFGVHPKQOAHMTDPLRLLLLEVSYEAI VDDGINPASL 100  
FAS\_PIG MEEVVIAGMSGKLEPESENLOEFWANLIGGVDMVTDDRRWKAGLYGLPKRSGKLDLKFDAFFGVHPKQOAHMTDPLRLLLLEVSYEAI VDDGINPASL 100  
FAS\_CHICK MEDVVIAGIAGKLEPESENLOEFWANLIGGVDMVTDDRRWKAGLYGLPKRSGKLDLKFDAFFGVHPKQOAHMTDPLRLLLLEVSYEAI VDDGINPASL 100

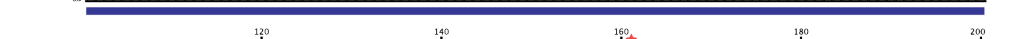

FAS\_MOUSE RGTNTGVWVGVSGSEASEALSRDPETLLGVSMVGCORAMMANRSLFFDFKGPSIALDTACSSLLALONAYQAI RSGGCPAAIVGGIINLLKPNLTVS 200  
FAS\_RAT RGTNTGVWVGVSGSEASEALSRDPETLLGVSMVGCORAMMANRSLFFDFKGPSIALDTACSSLLALONAYQAI RSGGCPAAIVGGIINLLKPNLTVS 200  
FAS\_HUMAN RGTHTGVWVGVSGSETSEALSRDPETLLGVSMVGCORAMMANRSLFFDFKGPSIALDTACSSLLALONAYQAI RSGGCPAAIVGGIINLLKPNLTVS 200  
FAS\_PIG RGTSTGVWVGVSSDASEALSRDPETLLGVSMVGCORAMMANRSLFFDFKGPSIALDTACSSLLALONAYQAI RSGGCPAAIVGGIINLLKPNLTVS 200  
FAS\_CHICK RGTDTGVWVGVSGSEALEALSDPEELLVGSMVGCORAMMANRSLFFDFKGPSIALDTACSSLLALONAYQAI RSGGCPAAIVGGIINLLKPNLTVS 200

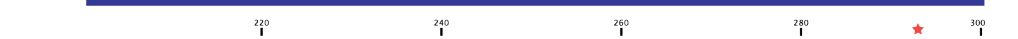

FAS\_MOUSE MKLGM LSPDGT CRSFDDSGSGYCRSEAVVAVLLTKKSLARRVYATILNAGNTDGSKEQGVTFPSGVEQELICSLYOPAGLAPLESLEYIEAHGTGTVK 300  
FAS\_RAT MKLGM LSPDGT CRSFDDSGSGYCRSEAVVAVLLTKKSLARRVYATILNAGNTDGSKEQGVTFPSGVEQELICSLYOPAGLAPLESLEYIEAHGTGTVK 300  
FAS\_HUMAN MKLGM LSPDGT CRSFDDSGSGYCRSEAVVAVLLTKKSLARRVYATILNAGNTDGSKEQGVTFPSGVEQELICSLYOPAGLAPLESLEYIEAHGTGTVK 300  
FAS\_PIG MKLGM LSPDGT CRSFDDSGSGYCRSEAVVAVLLTKKSLARRVYATILNAGNTDGSKEQGVTFPSGVEQELICSLYOPAGLAPLESLEYIEAHGTGTVK 300  
FAS\_CHICK MKLGM LSPDGT CRSFDDSGSGYCRSEAVVAVLLTKKSLARRVYATILNAGNTDGSKEQGVTFPSGVEQELICSLYOPAGLAPLESLEYIEAHGTGTVK 300

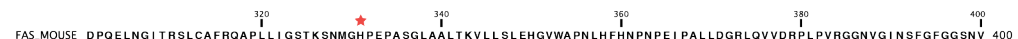

FAS\_MOUSE DPQELNGITRSLCAFRQAPLLIGSTKSNMGMPEPASGLAALTKVLLSLEHGVAWPNLHFNHPNPEIPALLDGRLOVVDRLPVRRGNGVINSFGFGGSNV 400  
FAS\_RAT DPQELNGITRSLCAFRQAPLLIGSTKSNMGMPEPASGLAALTKVLLSLEHGVAWPNLHFNHPNPEIPALLDGRLOVVDRLPVRRGNGVINSFGFGGSNV 400  
FAS\_HUMAN DPQELNGITRSLCAFRQAPLLIGSTKSNMGMPEPASGLAALTKVLLSLEHGVAWPNLHFNHPNPEIPALLDGRLOVVDRLPVRRGNGVINSFGFGGSNV 400  
FAS\_PIG DPQELNGITRSLCAFRQAPLLIGSTKSNMGMPEPASGLAALTKVLLSLEHGVAWPNLHFNHPNPEIPALLDGRLOVVDRLPVRRGNGVINSFGFGGSNV 400  
FAS\_CHICK DPQELNGITRSLCAFRQAPLLIGSTKSNMGMPEPASGLAALTKVLLSLEHGVAWPNLHFNHPNPEIPALLDGRLOVVDRLPVRRGNGVINSFGFGGSNV 400

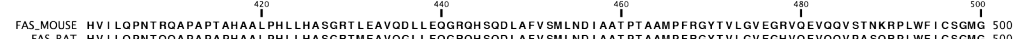

FAS\_MOUSE HVILQPNTRGAPAPATHAALPHLLHASGRTLEAVODLLEQGRHSODLAFVSM LNDIAATPTAAMPFRGYTVLVGEGVQEVQVSTNKRPLWFCISGMC 500  
FAS\_RAT HVILQPNTRGAPAPATHAALPHLLHASGRTLEAVODLLEQGRHSODLAFVSM LNDIAATPTAAMPFRGYTVLVGEGVQEVQVSTNKRPLWFCISGMC 500  
FAS\_HUMAN HVILQPNTRGAPAPATHAALPHLLHASGRTLEAVODLLEQGRHSODLAFVSM LNDIAATPTAAMPFRGYTVLVGEGVQEVQVSTNKRPLWFCISGMC 500  
FAS\_PIG HVILQPNTRGAPAPATHAALPHLLHASGRTLEAVODLLEQGRHSODLAFVSM LNDIAATPTAAMPFRGYTVLVGEGVQEVQVSTNKRPLWFCISGMC 500  
FAS\_CHICK HVILQPNTRGAPAPATHAALPHLLHASGRTLEAVODLLEQGRHSODLAFVSM LNDIAATPTAAMPFRGYTVLVGEGVQEVQVSTNKRPLWFCISGMC 499

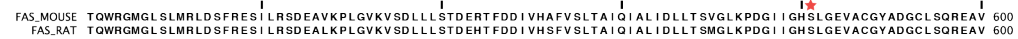

FAS\_MOUSE TQWRGMGLSMLRDSFRESILRSDEAVKPLGVKSDLLSTDEFTDDIVHAFVSLTAIQIALIDLTSVGLKPDGIGHSLGVEACGYADGCLSORFAV 600  
FAS\_RAT TQWRGMGLSMLRDSFRESILRSDEAVKPLGVKSDLLSTDEFTDDIVHAFVSLTAIQIALIDLTSVGLKPDGIGHSLGVEACGYADGCLSORFAV 600  
FAS\_HUMAN TQWRGMGLSMLRDSFRESILRSDEAVKPLGVKSDLLSTDEFTDDIVHAFVSLTAIQIALIDLTSVGLKPDGIGHSLGVEACGYADGCLSORFAV 600  
FAS\_PIG TQWRGMGLSMLRDSFRESILRSDEAVKPLGVKSDLLSTDEFTDDIVHAFVSLTAIQIALIDLTSVGLKPDGIGHSLGVEACGYADGCLSORFAV 600  
FAS\_CHICK TQWRGMGLSMLRDSFRESILRSDEAVKPLGVKSDLLSTDEFTDDIVHAFVSLTAIQIALIDLTSVGLKPDGIGHSLGVEACGYADGCLSORFAV 599

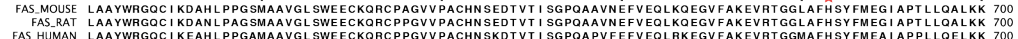

FAS\_MOUSE LAAYWRGDCIKDANLPPGMAAVGLSWECEKQRCPPGVVPACHNSDVTYISGPOAAVNEFVEQLKQEGVFAKEVTRTGLAFHFSYFMEIAPTLLQALKK 700  
FAS\_RAT LAAYWRGDCIKDANLPPGMAAVGLSWECEKQRCPPGVVPACHNSDVTYISGPOAAVNEFVEQLKQEGVFAKEVTRTGLAFHFSYFMEIAPTLLQALKK 700  
FAS\_HUMAN LAAYWRGDCIKDANLPPGMAAVGLSWECEKQRCPPGVVPACHNSDVTYISGPOAAVNEFVEQLKQEGVFAKEVTRTGLAFHFSYFMEIAPTLLQALKK 700  
FAS\_PIG LAAYWRGDCIKDANLPPGMAAVGLSWECEKQRCPPGVVPACHNSDVTYISGPOAAVNEFVEQLKQEGVFAKEVTRTGLAFHFSYFMEIAPTLLQALKK 700  
FAS\_CHICK LAAYWRGDCIKDANLPPGMAAVGLSWECEKQRCPPGVVPACHNSDVTYISGPOAAVNEFVEQLKQEGVFAKEVTRTGLAFHFSYFMEIAPTLLQALKK 699

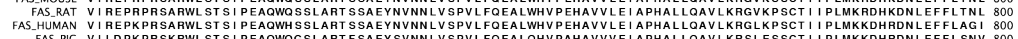

FAS\_MOUSE VIREPRPRARWLSSTISPEAQWSSSLARTSSAEYVNNLVSPVLFQEAALWHIPEHAVVLEIAPHALLOAVLKRGVKSSCTIIPLMKRDHKNLEFFLNTL 800  
FAS\_RAT VIREPRPRARWLSSTISPEAQWSSSLARTSSAEYVNNLVSPVLFQEAALWHIPEHAVVLEIAPHALLOAVLKRGVKSSCTIIPLMKRDHKNLEFFLNTL 800  
FAS\_HUMAN VIREPRPRARWLSSTISPEAQWSSSLARTSSAEYVNNLVSPVLFQEAALWHIPEHAVVLEIAPHALLOAVLKRGVKSSCTIIPLMKRDHKNLEFFLNTL 800  
FAS\_PIG VIREPRPRARWLSSTISPEAQWSSSLARTSSAEYVNNLVSPVLFQEAALWHIPEHAVVLEIAPHALLOAVLKRGVKSSCTIIPLMKRDHKNLEFFLNTL 800  
FAS\_CHICK VIREPRPRARWLSSTISPEAQWSSSLARTSSAEYVNNLVSPVLFQEAALWHIPEHAVVLEIAPHALLOAVLKRGVKSSCTIIPLMKRDHKNLEFFLNTL 799

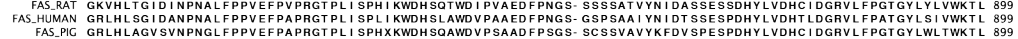

FAS\_MOUSE GKVHLTGIDINPNALFPVPEFPAFRGTPLISPHIKWDSQTDVPAEDFPNGS-SSSSATVYIADSPESPDHYLDHICIDGRVIFPGTGYLCLVWKT 899  
FAS\_RAT GKVHLTGIDINPNALFPVPEFPAFRGTPLISPHIKWDSQTDVPAEDFPNGS-SSSSATVYIADSPESPDHYLDHICIDGRVIFPGTGYLCLVWKT 899  
FAS\_HUMAN GRLLHLSGIDINPNALFPVPEFPAFRGTPLISPHIKWDSQTDVPAEDFPNGS-SSSSATVYIADSPESPDHYLDHICIDGRVIFPGTGYLCLVWKT 899  
FAS\_PIG GRLLHLSGIDINPNALFPVPEFPAFRGTPLISPHIKWDSQTDVPAEDFPNGS-SSSSATVYIADSPESPDHYLDHICIDGRVIFPGTGYLCLVWKT 899  
FAS\_CHICK GKVHLTGIDINPNALFPVPEFPAFRGTPLISPHIKWDSQTDVPAEDFPNGS-SSSSATVYIADSPESPDHYLDHICIDGRVIFPGTGYLCLVWKT 899

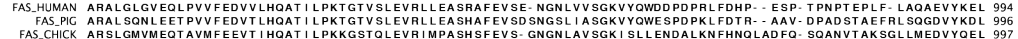

FAS\_MOUSE ARSLCLSLLEETPVFENVTFHOATILPKTGTVALEVRLEASHAFVEVSD-TGNLIVSGKVVYLEDQVNSKLFDPH-EVPTPPESASVSRLLTOGEVYKEL 995  
FAS\_RAT ARSLCLSLLEETPVFENVTFHOATILPKTGTVALEVRLEASHAFVEVSD-TGNLIVSGKVVYLEDQVNSKLFDPH-EVPTPPESASVSRLLTOGEVYKEL 995  
FAS\_HUMAN ARALGLVLEETPVFENVTFHOATILPKTGTVALEVRLEASHAFVEVSD-TGNLIVSGKVVYLEDQVNSKLFDPH-EVPTPPESASVSRLLTOGEVYKEL 994  
FAS\_PIG ARALGLVLEETPVFENVTFHOATILPKTGTVALEVRLEASHAFVEVSD-TGNLIVSGKVVYLEDQVNSKLFDPH-EVPTPPESASVSRLLTOGEVYKEL 996  
FAS\_CHICK ARSLGMVMEQTAVFEEVTFHOATILPKTGTVALEVRLEASHAFVEVSD-TGNLIVSGKVVYLEDQVNSKLFDPH-EVPTPPESASVSRLLTOGEVYKEL 997

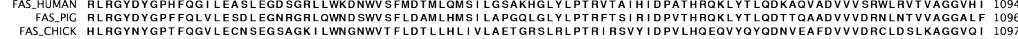

FAS\_MOUSE RLRGYDYGPFQGGICEATLEGEQGLLWKDNWVTFMDTLMQVLSLIGSSQOSSLQLPTRVTAIYIDPATHRQKVVYLEDQVNSKLFDPH-EVPTPPESASVSRLLTOGEVYKEL 1095  
FAS\_RAT RLRGYDYGPFQGGICEATLEGEQGLLWKDNWVTFMDTLMQVLSLIGSSQOSSLQLPTRVTAIYIDPATHRQKVVYLEDQVNSKLFDPH-EVPTPPESASVSRLLTOGEVYKEL 1095  
FAS\_HUMAN RLRGYDYGPFQGGICEATLEGEQGLLWKDNWVTFMDTLMQVLSLIGSSQOSSLQLPTRVTAIYIDPATHRQKVVYLEDQVNSKLFDPH-EVPTPPESASVSRLLTOGEVYKEL 1094  
FAS\_PIG RLRGYDYGPFQGGICEATLEGEQGLLWKDNWVTFMDTLMQVLSLIGSSQOSSLQLPTRVTAIYIDPATHRQKVVYLEDQVNSKLFDPH-EVPTPPESASVSRLLTOGEVYKEL 1096  
FAS\_CHICK RLRGYDYGPFQGGICEATLEGEQGLLWKDNWVTFMDTLMQVLSLIGSSQOSSLQLPTRVTAIYIDPATHRQKVVYLEDQVNSKLFDPH-EVPTPPESASVSRLLTOGEVYKEL 1097

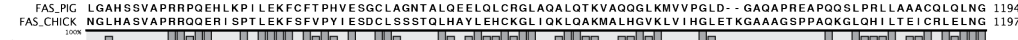

FAS\_MOUSE SRLQTTASRRQEQVLPTEKFFVTPHMEAECLSESTALQELQELCKGLARALQTKATQOGLKAMLGQE-----DPPHGLPRLLAACQLQNLG 1187  
FAS\_RAT SRLQTTASRRQEQVLPTEKFFVTPHMEAECLSESTALQELQELCKGLARALQTKATQOGLKAMLGQE-----DPPHGLPRLLAACQLQNLG 1187  
FAS\_HUMAN SGLHTESAPRRQEQVLPTEKFFVTPHMEAECLSESTALQELQELCKGLARALQTKATQOGLKAMLGQE-----DPPHGLPRLLAACQLQNLG 1192  
FAS\_PIG LGAHSSVAPRRQEQVLPTEKFFVTPHMEAECLSESTALQELQELCKGLARALQTKATQOGLKAMLGQE-----DPPHGLPRLLAACQLQNLG 1194  
FAS\_CHICK NGLHASVAPRRQEQVLPTEKFFVTPHMEAECLSESTALQELQELCKGLARALQTKATQOGLKAMLGQE-----DPPHGLPRLLAACQLQNLG 1197

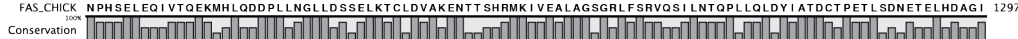

FAS\_MOUSE NLQELGELGAOERLLEDPDPLISGLLNSQALKACVDTALENLSLTKMKVAVELAGEGHLVYSRIPALLNTPMLQLEYATDRHPQALKDVQTKLQOHDV 1287  
FAS\_RAT NLQELGELGAOERLLEDPDPLISGLLNSQALKACVDTALENLSLTKMKVAVELAGEGHLVYSRIPALLNTPMLQLEYATDRHPQALKDVQTKLQOHDV 1287  
FAS\_HUMAN NLQELGELGAOERLLEDPDPLISGLLNSQALKACVDTALENLSLTKMKVAVELAGEGHLVYSRIPALLNTPMLQLEYATDRHPQALKDVQTKLQOHDV 1292  
FAS\_PIG NLQELGELGAOERLLEDPDPLISGLLNSQALKACVDTALENLSLTKMKVAVELAGEGHLVYSRIPALLNTPMLQLEYATDRHPQALKDVQTKLQOHDV 1294  
FAS\_CHICK NPSLELQVLTQEKMLQDDPLISGLLNSQALKACVDTALENLSLTKMKVAVELAGEGHLVYSRIPALLNTPMLQLEYATDRHPQALKDVQTKLQOHDV 1297

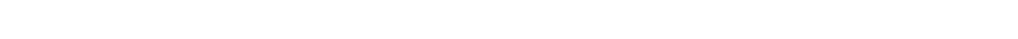



**Figure S5: Sequences of animal type I FAS.** The sequences were obtained from NCBI (<http://www.ncbi.nlm.nih.gov>; UniProt accession codes: murine FAS: P19096; rat FAS: P12785; human FAS: P49327; porcine FAS: A5YV76 and chicken FAS: P12276. Primary sequences were aligned using Clustal Omega. Sequence numbering based on murine FAS (mFAS) used in the construct design. The colored bars indicate the different domains according to the following color code: KS, blue; MAT, light green; DH, orange; KR, dark green; ER, yellow; ACP, magenta; TE, brown. Catalytic residues are indicated by asterisks. Amino acid conservation within set of presented sequences is given in percent.



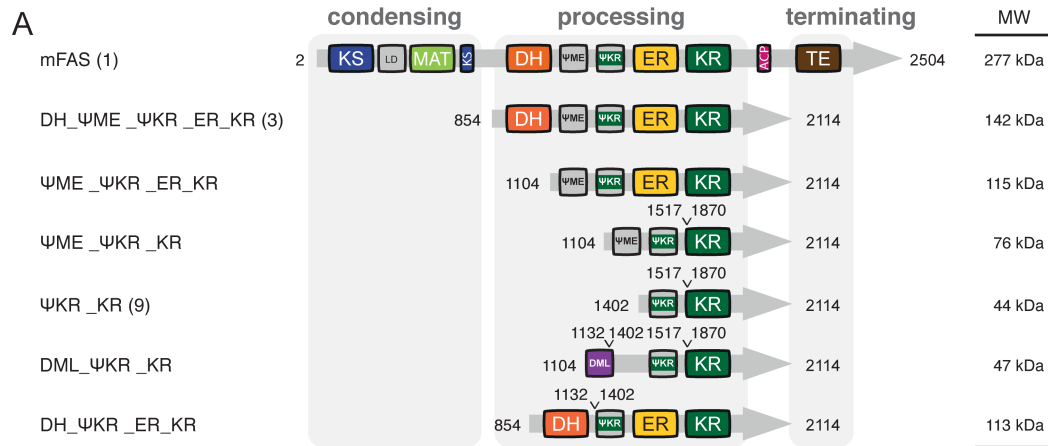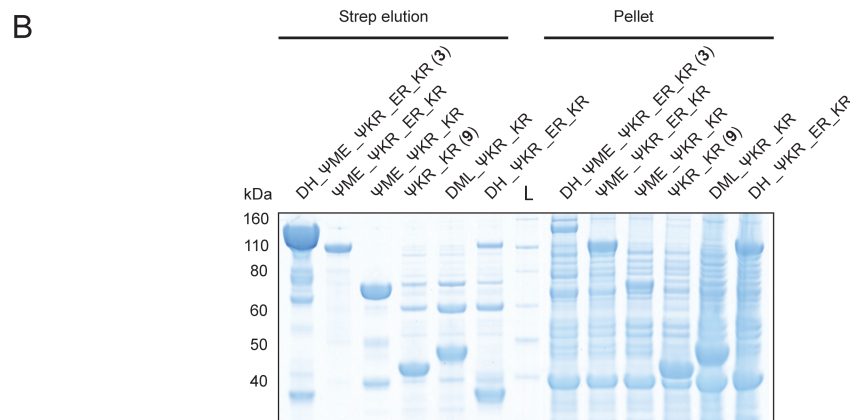

**Figure S6: Deconstruction of the processing part of mFAS.** (A) Domain organization of mFAS and constructs of the processing part. Construct number are given in brackets. All amino acid positions/numbers refer to the wild type mFAS. Molecular weights refer to proteins without the N-terminal methionine. The abbreviation DML refers to the linker between the DH and ΨME domain. (B) Comparison of soluble and aggregated fractions of various truncated constructs of the processing part. Constructs were solely purified with a Strep-Tactin columns, which explains the relatively high degree of contamination.

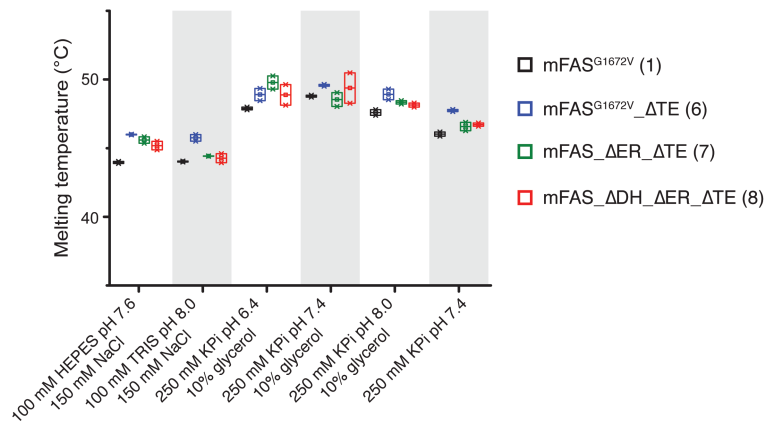

**Figure S7: Stability of PKS-like reducing modules.** Melting temperatures were determined by a thermal shift assay as described in the Methods section. The four constructs were tested in different buffer conditions. In general, phosphate buffers and glycerol have a stabilizing effect on these proteins and melting temperatures were in between 44-50 °C. Two replicates are shown as bar plot.

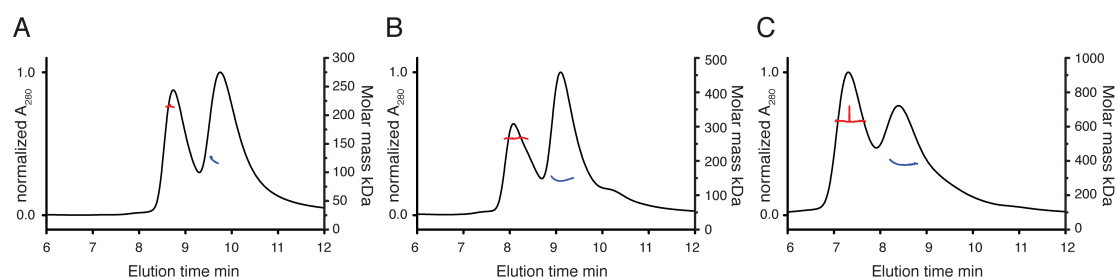

**Figure S8: Confirmation of the oligomeric state of select constructs.** HPLC-MALS analysis (multiangle light scattering) of select constructs with absorption normalized to the highest peak. (A) KS-MAT-ACP (**17**): the first and the second peaks correspond to 215 (216) and 121 (108) kDa. (B) KS-MAT-ACP-TE (**22**): the first and the second peaks correspond to 266 (284) and 149 (142) kDa. (C) LD-MAT-ACP-mFAS (**25**): the first and the second peaks correspond to 632 (674) and 390 (337) kDa. The calculated masses confirm the two oligomeric states, peak 1 and peak 2 referring to monomeric and dimeric states of the samples, respectively. The theoretical masses are given in brackets.

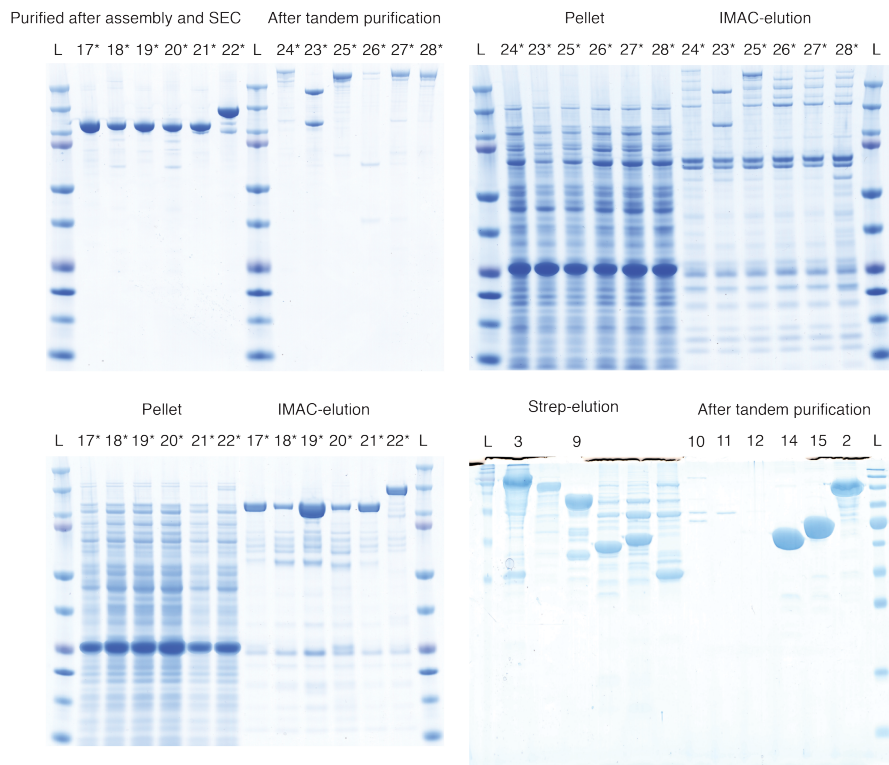

**Figure S9: Original pictures of relevant presented gels.**

**Table S1:** List of plasmids

| Number | Important Construct                  | Name                                                         |
|--------|--------------------------------------|--------------------------------------------------------------|
| pAR018 | 1; mFAS                              | pAR18_Strepl_mFASm_H8_pET22b                                 |
| pAR069 | 2; KS-MAT; condensing part           | pAR69_STRI_m(KS_MAT)_H8_pET22b                               |
| pAR236 | 3; processing part                   | pAR236_Strepl_m(DH_ps_ER_KR)_H8_pET22b                       |
| pAR100 | 4; apo-ACP                           | pAR100_Strepl_mACP_H8_pET22b                                 |
| pAR194 | 5; TE                                | pAR194_mTEI_H8_pET22b                                        |
| pAR088 | 6; mFAS_ΔTE                          | pAR88_Strepl_mFASm_ΔTE_H8_pET22b                             |
| pAR162 | 7; mFAS_ΔER_ΔTE                      | pAR162_Strepl_mFASm_ΔER_ΔTE_H8_pET22b                        |
| pAR163 | 8; mFAS_ΔDH_ΔER_ΔTE                  | pAR163_Strepl_mFASm_ΔDH_ΔER_ΔTE_H8_pET22b                    |
| pAR239 | 9; ΨKR_KR                            | pAR239_Strepl_m(psKR_KR)_H8_pET22b                           |
| pAR243 | 10; KSt <sub>trunc</sub>             | pAR243_STRI_mKS_H8_pET22b                                    |
| pAR244 | 11; KS-LD                            | pAR244_STRI_m(KS_LD)_H8_pET22b                               |
| pAR245 | 12; MAT <sub>trunc</sub>             | pAR245_Strepl_mMAT_H8_pET22b                                 |
| pAR309 | 13; MAT <sub>Ave</sub>               | pAR309_Strepl_mMAT(Structure)_H8_pET22b                      |
| pAR246 | 14; LD-MAT                           | pAR246_Strepl_m(LD_MAT)_H8_pET22b                            |
| pAR247 | 15; LD-MAT-pAT                       | pAR247_STRI_m(LD_MAT_postATL)_H8_pET22b                      |
| pAR327 | 16; MAT <sub>Ave</sub> -MBP          | pAR327_Strepl_mMAT(Structure)_GGGS_MBP_H8_pET22b-1           |
| pAR127 | 17; KS-MAT-ACP                       | pAR127_Strepl_m(KS_MAT)_mouseL_ACP_H8_pET22b                 |
| pAR125 | 18; KS-MAT-AM3L-ACP                  | pAR125_Strepl_m(KS_MAT)_AM3L_ACP_H8_pET22b                   |
| pAR151 | 19; KS-MAT-AM3L2-ACP                 | pAR151_Strepl_m(KS_MAT)_AM3L2_ACP_H8_pET22b                  |
| pAR126 | 20; KS-MAT-AM11L-ACP                 | pAR126_Strepl_m(KS_MAT)_AM11L_ACP_H8_pET22b                  |
| pAR152 | 21; KS-MAT-AM11L2-ACP                | pAR152_Strepl_m(KS_MAT)_AM11L2_ACP_H8_pET22b                 |
| pAR128 | 22; KS-MAT-ACP-TE                    | pAR128_Strepl_m(KS_MAT)_mouseL_ACP_TE_H8_pET22b              |
| pAR168 | 23; KS-MAT-ACP-m(KMA)                | pAR168_Strepl_m(KS_MAT_mL_ACP)_mL_m(KS_MAT_mL_ACP)_H8_pET22b |
| pAR167 | 24; KS-MAT-ACP-mFAS                  | pAR167_Strepl_m(KS_MAT_mL_ACP)_mL_mFASm_H8_pET22b            |
| pAR292 | 25; LD-MAT-ACP-mFAS                  | pAR292_Strepl_m(LD_MAT_mACP)_mFASm_H8_pET22b                 |
| pAR306 | 26; (AT0-ACP0) <sub>AVES</sub> -mFAS | pAR306_Strepl_AVES(AT0_ACP0)_mFASm_H8_pET22b                 |
| pAR307 | 27; (AT0-ACP0) <sub>DEBS</sub> -mFAS | pAR307_Strepl_DEBS(AT0_ACP0)_mFASm_H8_pET22b                 |
| pAR340 | 28; MAT <sub>Ave</sub> -ACP-mFAS     | pAR340_Strepl_mMAT(Str)_GGGS_mACP_GGS_mFASm_H8_pET22b        |
| pAR291 | 29; LD-MAT-mFAS                      | pAR291_Strepl_m(LD_MAT)_mFASm_H8_pET22b                      |
| pAR357 | Sfp                                  | pAR357_SFP_pCDF-1b                                           |

  

| Number | Constructs (Sup. Info) | Name                                               |
|--------|------------------------|----------------------------------------------------|
| pAR001 | MBP-hFASe              | pAR01_Strepl_MBP_hFASe_H8_pET22b                   |
| pAR002 | TRX-hFASe              | pAR02_Strepl_Trx_hFASe_H8_pET22b                   |
| pAR003 | Sumo-hFASe             | pAR03_Strepl_SUMO3_hFASe_H8_pET22b                 |
| pAR010 | hFASe_aSm              | pAR10_Strepl_hFASe(aSTARTm)_H8_pET22b              |
| pAR011 | MBP-hFASe_aSm          | pAR11_Strepl_MBP_hFASe(aSTARTm)_H8_pET22b          |
| pAR012 | TRX-hFASe_aSm          | pAR12_Strepl_Trx_hFASe(aSTARTm)_H8_pET22b          |
| pAR013 | Sumo-hFASe_aSm         | pAR13_Strepl_SUMO3_hFASe(aSTARTm)_H8_pET22b        |
| pAR017 | hFAS                   | pAR17_Strepl_hFASh_H8_pET22b                       |
| pAR026 | StrII-hFASe-H8         | pAR26_Strepl_hFASe(aSTARTm)_H8_pET22b              |
| pAR036 | TF(N+C)+hFASe          | pAR36b_TF(N+C)_RBS_Strepl_hFASe(aSTARTm)_H8_pET22b |
| pAR038 | MBP-hFAS               | pAR38_MBP_hFASh_H8_pMAL-c5G                        |
| pAR237 | ΨME_ΨKR_ER_KR          | pAR237_Strepl_m(ps_ER_KR)_H8_pET22b                |
| pAR238 | ΨME_ΨKR_KR             | pAR238_Strepl_m(ps_KR)_H8_pET22b                   |
| pAR240 | DML_ΨKR_KR             | pAR240_Strepl_m(PKSL_psKR_KR)_H8_pET22b            |
| pAR241 | DH_ΨKR_ER_KR           | pAR241_Strepl_m(DH_psKR_ER_KR)_H8_pET22b           |

  

| Number | Chaperones (Sup. Info) | Name                                  |
|--------|------------------------|---------------------------------------|
| pAR32A | TF                     | pAR32_TF_pETcoco-1                    |
| pAR32B | TF(N+C)                | pAR32b_TF(N+C)_pETcoco-1-1            |
| pAR033 | X                      | pAR33_mycdodecin_pETcoco              |
| pAR035 | DnaK-/DnaJ             | pAR35_DnaK_RBS_DnaJ_pETcoco           |
| pAR039 | pfPfdB                 | pAR39_pfuPre(b)_pETcoco               |
| pAR043 | GroEL/GroES            | pAR43_GroES_RBS_GroEL_pETcoco         |
| pAR044 | DnaK-/DnaJ/GrpE        | pAR44_DnaK_RBS_DnaJ_RBS_GrpE_pETcoco  |
| pAR045 | prefoldin (pfuPfdB)    | pAR45_pfuPre(b)_RBS_pfuPre(a)_pETcoco |
| pAR046 | pf1883                 | pAR46_PF1883_pETcoco                  |
| pAR047 | pfCpn                  | pAR47_PfCPN_pETcoco                   |
| pAR048 | lbpA/lbpB              | pAR48_lbpA_RBS_lbpB_pETcoco           |
| pAR049 | ClpB                   | pAR49_ClpB_pETcoco                    |

**Table S2:** List of primers for the cloning of respective plasmids

| Number | Name                | Length | Orientation | T <sub>m</sub> [°C]* | Sequence (5'3')                                               | Construct Template |
|--------|---------------------|--------|-------------|----------------------|---------------------------------------------------------------|--------------------|
| AR37   | Step_mFASm_infusion | 41     | forward     | 55.4                 | GTTCGAAAAAGGCGCGGATCCgaggagtggtgatagccg                       | 1                  |
| AR38   | mFASm_His_infusion  | 36     | reverse     | 55.4                 | GGTGATGATGCTCGAGccctccgacacactc                               | IRAVp968           |
| AR163  | hMAT_His_for        | 36     | forward     | 53.2                 | cagggtccctcagccCATCATCACACCACCACC                             | 2                  |
| AR148  | mMAT_hDH_rev        | 36     | reverse     | 55.9                 | ctgaggggaacctgagcgtgtgggaagctcctcag                           | pAR18              |
| AR422  | StrI_mDH_for        | 36     | forward     | 55.9                 | CGAAAAAGGCGCGGATCCagctcctctctgctac                            | 3                  |
| AR204  | ΔmACPTE_His_rev     | 33     | reverse     | 57.2                 | GTGATGATGCTCGAGggtcccaatggcccaacagc                           | pAR18              |
| AR176  | STRILL_mACP_for     | 30     | forward     | 56.2                 | TCGAAAAAGGCGCGCGgggagcgggacacc                                | 4                  |
| AR227  | mACP_H8_rev         | 35     | reverse     | 57.9                 | GTGATGATGCTCGAGgggggctgtctgtcagtag                            | pAR18              |
| AR349  | pET22b_mTEI_for     | 38     | forward     | 56.7                 | AGAAAGGATATACATATCtccagagtgacacgtctc                          | 5                  |
| AR38   | mFASm_His_infusion  | 36     | reverse     | 55.4                 | GGTGATGATGCTCGAGccctccgacacactc                               | pAR18              |
| AR37   | Step_mFASm_infusion | 41     | forward     | 55.4                 | GTTCGAAAAAGGCGCGGATCCgaggagtggtgatagccg                       | 6                  |
| AR203  | ΔmTE_His_rev        | 36     | reverse     | 56.3                 | GTGATGATGCTCGAGtctgtctcagtagccagtc                            | pAR18              |
| AR311  | ΔmER_for            | 35     | forward     | 55.9                 | gagcaggacaagccctcaagactctgccaccg                              | 7                  |
| AR312  | ΔmER_rev            | 21     | reverse     | 56.3                 | gggtgtctctctcactg                                             | pAR88              |
| AR313  | ΔmDH_for            | 19     | forward     | 55.4                 | tcacggcgccagcaagaac                                           | 8                  |
| AR314  | ΔmDH_rev            | 33     | reverse     | 54.9                 | ttgtctccgctgaagaggaggagctggagcc                               | pAR88              |
| AR424  | StrI_mpsKR_for      | 41     | forward     | 54.8                 | CGAAAAAGGCGCGGATCCccacagggaaacclatctcc                        | 9                  |
| AR204  | ΔmACPTE_His_rev     | 33     | reverse     | 57.2                 | GTGATGATGCTCGAGggtcccaatggcccaacagc                           | pAR162             |
| AR429  | m(LD_MAT)del_for    | 41     | forward     | 55.9                 | cagcccaacacagggCGCGCgagggactcctctctc                          | 10                 |
| AR430  | m(LD_MAT)del_rev    | 19     | reverse     | 57.6                 | ccgtgtgttggctggagag                                           | pAR18              |
| AR431  | mMATdel_for         | 39     | forward     | 57.4                 | caagaagtgcagcaaatgctcaccatctcctctgatg                         | 11                 |
| AR432  | mMATdel_rev         | 22     | reverse     | 56.7                 | ttgtctcactcttggacacgg                                         | pAR18              |
| AR433  | STRILL_mMAT_for     | 39     | forward     | 56.3                 | GAAAAAGGCGCGGATCCctctctctctctcaggg                            | 12                 |
| AR434  | mMAT_H8_rev         | 34     | reverse     | 57.6                 | GTGATGATGCTCGAGgctcctctcaggacacgg                             | pAR18              |
| AR512  | STRILL_mMAT2_for    | 37     | forward     | 55.4                 | GAAAAAGGCGCGGATCCcaccacaagaagcccaac                           | 13                 |
| AR513  | mMAT2_H8_rev        | 34     | reverse     | 55.4                 | GTGATGATGCTCGAGgctcctctcaggacacgg                             | pAR18              |
| AR435  | STRILL_mLD_for      | 34     | forward     | 56.2                 | GAAAAAGGCGCGGATCCgcccctcggcccaactg                            | 14                 |
| AR436  | mLD_H8_rev          | 36     | reverse     | 56.3                 | GTGATGATGCTCGAGggtgggaacaagctgtagg                            | pAR18              |
| AR435  | STRILL_mLD_for      | 34     | forward     | 56.2                 | GAAAAAGGCGCGGATCCgcccctcggcccaactg                            | 15                 |
| AR148  | mMAT_hDH_rev        | 36     | reverse     | 55.9                 | ctgaggggaacctgagcgtgtgggaagctcctcag                           | pAR18              |
| AR202  | LEHis_for           | 21     | forward     | 56.3                 | CTCAGCATCATCACCCACAC                                          | 16                 |
| AR537  | mMATstr_GGS_rev     | 43     | reverse     | 55.4                 | CGATCCACCGCCAGAACCTCCACCgatcgtgaggtgacc                       | pAR309             |
| AR539  | GS_MalE_for         | 44     | forward     | 53.7                 | GTTCGGCGGTGGATCGAAATCCGAAGTAACCTGGTAATC                       | 16                 |
| AR540  | MalE_H8_rev         | 35     | reverse     | 55.9                 | GTGATGATGCTCGAGAGTCTCGCGCTTTTCAGGG                            | pMAL-c5G           |
| AR272  | mMAT_mouseL_for     | 37     | forward     | 56.3                 | cagcatcagccagctgagcagagaagaagctgtggcc                         | 17                 |
| AR273  | mouseL_mACP_rev     | 21     | reverse     | 56.3                 | actgggtctgactgtctgagac                                        | pAR88              |
| AR267  | mACP_for            | 16     | forward     | 56.2                 | ggggagcgggacacc                                               | 18                 |
| AR266  | mKS_W_rev           | 20     | reverse     | 55.9                 | ccaagctcactgtgttcc                                            | pAR88              |
| AR268  | mMAT_AM3L_for       | 37     | forward     | 54.9                 | ggaccacagtcagactggtCTCCAAACACCCGGCAAG                         | 18                 |
| AR269  | AM3L_mACP_rev       | 35     | reverse     | 55.4                 | gggtgtccctcccccCAGGAGCATCACGACG                               | DSM46492           |
| AR267  | mACP_for            | 16     | forward     | 56.2                 | ggggagcgggacacc                                               | 19                 |
| AR299  | mKS_G_mouseL_rev    | 39     | reverse     | 55.9                 | cctcagcaaccgggacatcccaagctcactgtgttcc                         | pAR88              |
| AR297  | mMAT_AM3L2_for      | 48     | forward     | 57.2                 | gtcccggtctcagacttcccaaacggcCCGAGCGAAGCCGTGAG                  | 19                 |
| AR269  | AM3L_mACP_rev       | 35     | reverse     | 55.4                 | gggtgtccctcccccCAGGAGCATCACGACG                               | DSM46492           |
| AR267  | mACP_for            | 16     | forward     | 56.2                 | ggggagcgggacacc                                               | 20                 |
| AR266  | mKS_W_rev           | 20     | reverse     | 55.9                 | ccaagctcactgtgttcc                                            | pAR88              |
| AR270  | mMAT_AM11L_for      | 36     | forward     | 54.3                 | ggaccacagtcagactggtCTGGATGTGGAGGGGGC                          | 20                 |
| AR271  | AM11L_mACP_rev      | 32     | reverse     | 56.2                 | gggtgtccctctcccccGCGAGGACGTCGCGC                              | DSM46492           |
| AR267  | mACP_for            | 16     | forward     | 56.2                 | ggggagcgggacacc                                               | 20                 |
| AR299  | mKS_G_mouseL_rev    | 39     | reverse     | 55.9                 | cctcagcaaccgggacatcccaagctcactgtgttcc                         | pAR88              |
| AR298  | mMAT_AM11L2_for     | 47     | forward     | 54.3                 | gtcccggtctcagacttcccaaacggcGTCTCGGCGAGTGGGG                   | 20                 |
| AR271  | AM11L_mACP_rev      | 32     | reverse     | 56.2                 | gggtgtccctctcccccGCGAGGACGTCGCGC                              | DSM46492           |
| AR272  | mMAT_mouseL_for     | 37     | forward     | 56.3                 | cagcatcagccagctgagcagagaagaagctgtggcc                         | 22                 |
| AR273  | mouseL_mACP_rev     | 21     | reverse     | 56.3                 | actgggtctgactgtctgagac                                        | pAR18              |
| AR317  | mFASm_for           | 19     | forward     | 55.4                 | gaggagtggtgatagccg                                            | 23                 |
| AR428  | StrepGS_rev         | 19     | reverse     | 55.4                 | GGATCCGGCGCCTTTTTTCG                                          | pAR127             |
| AR37   | Step_mFASm_infusion | 41     | forward     | 55.4                 | GTTCGAAAAAGGCGCGGATCCgaggagtggtgatagccg                       | 23                 |
| AR318  | mACP_mL_mFAS_rev    | 40     | reverse     | 56.7                 | ggctatcaccactcctcagactgtcactcctggactg                         | pAR127             |
| AR317  | mFASm_for           | 19     | forward     | 55.4                 | gaggagtggtgatagccg                                            | 24                 |
| AR428  | StrepGS_rev         | 19     | reverse     | 55.4                 | GGATCCGGCGCCTTTTTTCG                                          | pAR18              |
| AR37   | Step_mFASm_infusion | 41     | forward     | 55.4                 | GTTCGAAAAAGGCGCGGATCCgaggagtggtgatagccg                       | 24                 |
| AR318  | mACP_mL_mFAS_rev    | 40     | reverse     | 56.7                 | ggctatcaccactcctcagactgtcactcctggactg                         | pAR127             |
| AR494  | NotI_mLD_for        | 36     | forward     | 54.3                 | GTTCGAAAAAGGCGCGCAGccactcagacactctc                           | 25                 |
| AR496  | mACP_NotI_rev       | 39     | reverse     | 56.7                 | acctctcTGC GGCCGAGagagtgctcactcctggactg                       | pAR127             |
| AR467  | NotI_mFAS_for       | 34     | forward     | 55.4                 | GAAAAAGCGCGCGCAGagagtggtgatagccg                              | 25                 |
| AR468  | NotI_Step1_rev      | 30     | reverse     | 56.3                 | cTGC GGCCGCTTTTTCGAAC TCGGGGTGGC                              | pAR18              |
| AR508  | NotI_AVES(AT0)_for  | 34     | forward     | 54.3                 | GTTCGAAAAAGGCGCGCAGAGGATGGACGGCGGG                            | 26                 |
| AR509  | AVES(ACP0)_NotI_rev | 32     | reverse     | 56.2                 | caactctcTGC GGCCGCGCTCCCTCCGTGGC                              | DSM46492           |
| AR467  | NotI_mFAS_for       | 34     | forward     | 55.4                 | GAAAAAGCGCGCGCAGagagtggtgatagccg                              | 26                 |
| AR468  | NotI_Step1_rev      | 30     | reverse     | 56.3                 | cTGC GGCCGCTTTTTCGAAC TCGGGGTGGC                              | pAR18              |
| AR510  | NotI_DEBS(AT0)_for  | 37     | forward     | 56.3                 | GTTCGAAAAAGGCGCGCAGCTGTCAAAGCTCTCCGAC                         | 27                 |
| AR511  | DEBS(ACP0)_NotI_rev | 34     | reverse     | 57.2                 | caactctcTGC GGCCGCGCGCTTCCTGTGGTC                             | pBP144             |
| AR467  | NotI_mFAS_for       | 34     | forward     | 55.4                 | GAAAAAGCGCGCGCAGagagtggtgatagccg                              | 27                 |
| AR468  | NotI_Step1_rev      | 30     | reverse     | 56.3                 | cTGC GGCCGCTTTTTCGAAC TCGGGGTGGC                              | pAR18              |
| AR522  | NotI_mMAT_for       | 38     | forward     | 55.4                 | GTTCGAAAAAGGCGCGCAGcccaacaagcgccacc                           | 28                 |
| AR537  | mMATstr_GGS_rev     | 43     | reverse     | 55.4                 | CGATCCACCGCCAGAACCTCCACCgatcgtgaggtgacc                       | pAR18              |
| AR560  | GS_mACP_for         | 46     | forward     | 56.2                 | GGTTCGCGCGTGGATCGGACGCTGGCTctgggagcgggacacc                   | 28                 |
| AR561  | mACP_GGS_rev        | 62     | reverse     | 53                   | CAGAGCCACCTCCGCTCGATCCACCGCCAGAACCTCCACCggaggacatctctgaagtttc | pAR18              |
| AR562  | GS_NotI_rev         | 56     | reverse     | 57.2                 | caactctcTGC GGCCGCGAGCCCCAGATCCACCCCGAGGCCACCTCCGCTCG         | 28                 |
| AR467  | NotI_mFAS_for       | 34     | forward     | 55.4                 | GAAAAAGCGCGCGCAGagagtggtgatagccg                              | 28                 |
| AR468  | NotI_Step1_rev      | 30     | reverse     | 56.3                 | cTGC GGCCGCTTTTTCGAAC TCGGGGTGGC                              | pAR18              |
| AR494  | NotI_mLD_for        | 36     | forward     | 54.3                 | GTTCGAAAAAGGCGCGCAGccactcagacactctc                           | 29                 |
| AR495  | postAT_NotI_rev     | 38     | reverse     | 54.4                 | acctctcTGC GGCCGCGCactgtgttccactctgatg                        | pAR127             |
| AR467  | NotI_mFAS_for       | 34     | forward     | 55.4                 | GAAAAAGCGCGCGCAGagagtggtgatagccg                              | 29                 |
| AR468  | NotI_Step1_rev      | 30     | reverse     | 56.3                 | cTGC GGCCGCTTTTTCGAAC TCGGGGTGGC                              | pAR18              |
| AR589  | pCDF1b_for          | 20     | forward     | 53.8                 | TTAactAGGCTGCTGCCAC                                           | Sfp                |
| AR590  | pCDF1b_rev          | 29     | reverse     | 53                   | catGGTATATCTCCTATTAAAGTTAAAC                                  | pCDF-1b            |
| AR591  | pCDF1b_SFP_for      | 43     | forward     | 52.1                 | AATAAGGAGATATACCatgaagattacggaattatagacc                      | Sfp                |
| AR592  | SFP_pCDF1b_rev      | 41     | reverse     | 54.4                 | CAGCAGCCTAGGTTAAttataaagctctctgtagagacc                       | SFP_bsub           |

|       |                           |    |         |           |                                                               |                |
|-------|---------------------------|----|---------|-----------|---------------------------------------------------------------|----------------|
| AR01  | Strep_MBP_SLIC            | 54 | forward | 49.2      | GGAGCCACCAGCTTCGAAAAAGGCGCCGAAAAATCGAAAGGTAATACTGG            | MBP-hFase      |
| AR02  | MBP_hFase_SLIC            | 47 | reverse | 51.1      | TCATACCTGCAATAACAACCTTCTTGGATCCGATGATGTCGCCACCC               | pMAL-c5G       |
| AR03  | Strep_TRX_SLIC            | 57 | forward | 52.8      | GGAGCCACCAGCTTCGAAAAAGGCGCCGAAAGGTAATACTGG                    | TRX-hFase      |
| AR04  | TRX_hFase_SLIC            | 49 | reverse | 54.9      | TCATACCTGCAATAACAACCTTCTTGGATCCGATGATGTCGCCACCC               | pET-32b(+)     |
| AR05  | Strep_SUMO3_SLIC          | 54 | forward | 53        | GGAGCCACCAGCTTCGAAAAAGGCGCCGAAAGGTAATACTGG                    | Sumo-hFase     |
| AR06  | SUMO3_hFase_SLIC          | 49 | reverse | 54.9      | TCATACCTGCAATAACAACCTTCTTGGATCCGATGATGTCGCCACCC               | pET28M_sumo3   |
| AR18  | hFase_aSTARTm_for         | 36 | forward | 55.3      | GATCGCGCGCTGGATATGGTACCAGATGATGATCG                           | hFase_aSm      |
| AR19  | hFase_aSTARTm_rev         | 36 | reverse | 53.2      | CACGCCCGCATAGATTATCCAAAATTCTTCGAC                             | pVR01          |
| AR18  | hFase_aSTARTm_for         | 36 | forward | 55.3      | GATCGCGCGCTGGATATGGTACCAGATGATGATCG                           | MBP-hFase_aSm  |
| AR19  | hFase_aSTARTm_rev         | 36 | reverse | 53.2      | CACGCCCGCATAGATTATCCAAAATTCTTCGAC                             | pAR001         |
| AR18  | hFase_aSTARTm_for         | 36 | forward | 55.3      | GATCGCGCGCTGGATATGGTACCAGATGATGATCG                           | TRX-hFase_aSm  |
| AR19  | hFase_aSTARTm_rev         | 36 | reverse | 53.2      | CACGCCCGCATAGATTATCCAAAATTCTTCGAC                             | pAR002         |
| AR18  | hFase_aSTARTm_for         | 36 | forward | 55.3      | GATCGCGCGCTGGATATGGTACCAGATGATGATCG                           | Sumo-hFase_aSm |
| AR19  | hFase_aSTARTm_rev         | 36 | reverse | 53.2      | CACGCCCGCATAGATTATCCAAAATTCTTCGAC                             | pAR003         |
| AR35  | Strep_hFash_infusion      | 43 | forward | 57.9      | AGTTGAAAAAGGCGCGGATCGgaggaggtggtggtgcccgg                     | hFAS           |
| AR36  | hFash_His_infusion        | 34 | reverse | 59.4      | GGTGTATGCTCGAGGccctcccgccagctcac                              | IRAK110        |
| AR57  | pET22b_STRltoII_for       | 33 | forward | 54.9      | ATACATATGAGCGCTGGAGCCACCCGCGTTC                               | Strl-hFase-H8  |
| AR58  | pET22b_STRltoII_rev       | 24 | reverse | 54        | AGCGCTCATATGTATATCTCCTTC                                      | pVR01          |
| AR81  | pET22b_Xba1_for           | 31 | forward | 56.4      | GGATAACAATCCCTCTAGAAAATAATTTTG                                | TF(N+C)+hFase  |
| AR82  | tig_RBS_rev               | 43 | reverse | 55.4/58.6 | CAAAATTTTTCAGCGCGGAtcaCGCTGCTGGTTCATCAGC                      | pAR32B         |
| AR87  | MBP_hFash_infusion_for    | 40 | forward | 57.9      | TCGTCGAGCGATCCGAATTCgaggaggtggtggtgcccgg                      | MBP-hFase      |
| AR40  | His_pMAL_infusion_rev     | 36 | reverse | 55.4      | CGTTTTATTGAACTTCATCGTGGTGGTGGTGG                              | pAR26          |
| AR423 | Strl_mpsMT_for            | 38 | forward | 55.4      | CGAAAAAGGCGCGGATCCtccgcccagcaagaac                            | WME_UKR        |
| AR204 | ΔmACPE_His_rev            | 33 | reverse | 57.2      | GTTGATGATCTCGAGtccatggtgcccagc                                | ER_KR          |
| AR311 | ΔmER_for                  | 35 | forward | 55.9      | gagcaggacaagccccaagacctgcccagc                                | pAR18          |
| AR312 | ΔmER_rev                  | 21 | reverse | 56.3      | ggctcttctgctctaaagc                                           | WME_UKR_KR     |
| AR409 | mFAS_psMTdel_for          | 22 | forward | 54.8      | ccacaggagaacctctctcc                                          | pAR237         |
| AR410 | mFAS_psMTdel_rev          | 35 | reverse | 55.9      | aggttctctgctgctcagacaggcaactcag                               | DML_UKR_KR     |
| AR409 | mFAS_psMTdel_for          | 22 | forward | 54.8      | ccacaggagaacctctctcc                                          | pAR238         |
| AR410 | mFAS_psMTdel_rev          | 35 | reverse | 55.9      | aggttctctgctgctcagacaggcaactcag                               | DH_UKR         |
| AR75  | pETcoco_tig_for           | 41 | forward | 56.4      | ggagataaagcatgCAAGTTTCAGTTGAAACCCTCAAGG                       | ER_KR          |
| AR76  | tig_pETcoco_rev           | 34 | reverse | 55.4      | agcagccggatctcaCGCTGCTGGTTCATCAGC                             | pAR236         |
| AR73  | pETcoco-1_lin_for         | 22 | forward | 54.8      | tgagatccggctgcaacaag                                          | TF             |
| AR74  | pETcoco-1_lin_rev         | 30 | reverse | 54.8      | catgcttatctctctttaaagtaaac                                    | TF             |
| AR75  | pETcoco_tig_for           | 41 | forward | 56.4      | ggagataaagcatgCAAGTTTCAGTTGAAACCCTCAAGG                       | pETCoco-1      |
| AR76  | tig_pETcoco_rev           | 34 | reverse | 55.4      | agcagccggatctcaCGCTGCTGGTTCATCAGC                             | TF(N+C)        |
| AR73  | pETcoco-1_lin_for         | 22 | forward | 54.8      | tgagatccggctgcaacaag                                          | Prof. Hartl    |
| AR74  | pETcoco-1_lin_rev         | 30 | reverse | 54.8      | catgcttatctctctttaaagtaaac                                    | TF(N+C)        |
| AR77  | pETcoco_mycododecin_for   | 39 | forward | 57.4      | ggagataaagcatgAGCAATCACACTACCGAGTATC                          | pETCoco-1      |
| AR78  | mycododecin_pETcoco_rev   | 34 | reverse | 55.4      | agcagccggatctcaGGAATCTCCAGCGGGAAG                             | X              |
| AR73  | pETcoco-1_lin_for         | 22 | forward | 54.8      | tgagatccggctgcaacaag                                          | mtDod          |
| AR74  | pETcoco-1_lin_rev         | 30 | reverse | 54.8      | catgcttatctctctttaaagtaaac                                    | X              |
| AR84  | pETcoco_DnaK_infusion_for | 39 | forward | 55.2      | ggagataaagcatgGGTAAATAATTGGTATCGACCTG                         | pETCoco-1      |
| AR83  | DnaK_RBS_rev              | 54 | reverse | 56.9      | CAAAATTTTTCAGCGCGGATCATTTTTGCTTTGACTTCTTCAAATTCAGC            | DnaK/DnaJ      |
| AR85  | DnaK_RBS_DnaJ_for         | 51 | forward | 54.5      | GACAAAAAATGATCGCGCTGAAATAAATTTTGTAACTTTAAGAAGGAG              | Prof. Hartl    |
| AR86  | DnaJ_pETcoco_infusion_rev | 33 | reverse | 54.9      | ggctgcttggcgccTCAGCGGGTCAGGTCGTC                              | DnaK/DnaJ      |
| AR73  | pETcoco-1_lin_for         | 22 | forward | 54.8      | tgagatccggctgcaacaag                                          | Prof. Hartl    |
| AR74  | pETcoco-1_lin_rev         | 30 | reverse | 54.8      | catgcttatctctctttaaagtaaac                                    | DnaK/DnaJ      |
| AR88  | pETcoco_pfuPre_for        | 40 | forward | 57.7      | gaaggagataaagcatgCAAAACATTCACCCCAAGTCC                        | pETCoco-1      |
| AR89  | pfuPre_pETcoco_rev        | 35 | reverse | 55.9      | ggctgcttggcgccTCATCCAGCGGTTGAGGTC                             | pPfdB          |
| AR97  | pETcoco_GroES_for         | 41 | forward | 54.8      | gaaggagataaagcatgAATATTCGCTCATTGCATGATCG                      | DSM3638        |
| AR98  | GroES_RBS_GroEL_rev       | 58 | reverse | 54.4      | CCTTAAATTCGATGTTCAAGTCTGCGCGGATACGCTTCAACAATGGCAGAATG         | Prof. Hartl    |
| AR99  | RBS_GroEL_for             | 60 | forward | 54.4      | CGACACTGAACATACGAATTAAGGAATAAAGATAATGGCAGCTAAAGACGTAATAATTCG  | GroEL/GroES    |
| AR100 | GroEL_pETcoco_rev         | 36 | reverse | 54.9      | gttagcagccggtctcaCATCATGCGCCCATGCC                            | Prof. Hartl    |
| AR73  | pETcoco-1_lin_for         | 22 | forward | 54.8      | tgagatccggctgcaacaag                                          | GroEL/GroES    |
| AR74  | pETcoco-1_lin_rev         | 30 | reverse | 54.8      | catgcttatctctctttaaagtaaac                                    | pETCoco-1      |
| AR84  | pETcoco_DnaK_infusion_for | 39 | forward | 55.2      | ggagataaagcatgGGTAAATAATTGGTATCGACCTG                         | DnaK/DnaJ/GrpE |
| AR83  | DnaK_RBS_rev              | 54 | reverse | 56.9      | CAAAATTTTTCAGCGCGGATCATTTTTGCTTTGACTTCTTCAAATTCAGC            | Prof. Hartl    |
| AR85  | DnaK_RBS_DnaJ_for         | 51 | forward | 54.5      | GACAAAAAATGATCGCGCTGAAATAAATTTTGTAACTTTAAGAAGGAG              | DnaK/DnaJ/GrpE |
| AR101 | DnaJ_RBS_rev              | 46 | reverse | 54.9      | CGCAGCATTCATCTCGGTAAGCGCGGATCAGCGGTCAGGTCGTC                  | Prof. Hartl    |
| AR102 | RBS_GrpE_for              | 64 | forward | 54.8      | CGCGAGATGATGCTCGGAAAAAAGCGGGAATAATCATGAGTAGTAAAGAACGAAAAACGCC | DnaK/DnaJ/GrpE |
| AR103 | GrpE_pETcoco_rev          | 42 | reverse | 55.7      | gttagcagccggtctcaCGCTTTTGTCTTCAGTACAGTTAC                     | Prof. Hartl    |
| AR73  | pETcoco-1_lin_for         | 22 | forward | 54.8      | tgagatccggctgcaacaag                                          | DnaK/DnaJ/GrpE |
| AR74  | pETcoco-1_lin_rev         | 30 | reverse | 54.8      | catgcttatctctctttaaagtaaac                                    | pETCoco-1      |
| AR88  | pETcoco_pfuPre_for        | 40 | forward | 57.7      | gaaggagataaagcatgCAAAACATTCACCCCAAGTCC                        | prefoldin      |
| AR72  | pET22b_rev                | 30 | reverse | 53.4      | CATATGATATCTCCTCTTAAAGTTAAAC                                  | (pfuPfdB)      |
| AR105 | RBS_pfuPreA_for           | 55 | forward | 54.1      | GTTTAACTTTAAGAAGGAGATATACATATGAAAAAATAAAGGAATTGAAAAAGG        | pAR39          |
| AR106 | pfuPreA_pETcoco_rev       | 42 | reverse | 56.7      | gttagcagccggtctCACTTCTTAAAGCTTGAAGCTGATTGC                    | prefoldin      |
| AR109 | pETcoco_PICPN_for         | 34 | forward | 55.4      | gaaggagataaagcatgGCCGATGACGAGCC                               | (pfuPfdB)      |
| AR110 | PICPN_pETcoco_rev         | 39 | reverse | 55.7      | gttagcagccggtctcaGCTAGATCACTGCTGAAGTC                         | DSM3638        |
| AR73  | pETcoco-1_lin_for         | 22 | forward | 54.8      | tgagatccggctgcaacaag                                          | pfCpn          |
| AR74  | pETcoco-1_lin_rev         | 30 | reverse | 54.8      | catgcttatctctctttaaagtaaac                                    | DSM3638        |
| AR111 | pETcoco_lbpA_for          | 40 | forward | 54        | gaaggagataaagcatgCGTAACTTTGATTATCCCGC                         | pETCoco-1      |
| AR112 | lbpA_RBS_rev              | 53 | reverse | 56.7      | CGGATAAGTACCTGCAAAATCCGAAGATTCAGTTGATTCGATACGCGCGCGG          | lbpA/lbpB      |
| AR113 | RBS_lbpB_for              | 23 | forward | 57.1      | CGGATTTGACAGGTACTACTCCG                                       | E. coli DNA    |
| AR114 | lbpB_pETcoco_rev          | 40 | reverse | 57.1      | gttagcagccggtctcaGCTATTTAACGCGGGAGGTTTCG                      | lbpA/lbpB      |
| AR104 | pETcoco_ClpB_for          | 45 | forward | 57.5      | gaaggagataaagcatgCGTCTGGATCGTCTTACTAATAAATTC                  | E. coli DNA    |
| AR105 | RBS_pfuPreA_for           | 55 | forward | 54.1      | GTTTAACTTTAAGAAGGAGATATACATATGAAAAAATAAAGGAATTGAAAAAGG        | ClpB           |

### **Supporting Note 1. Expression of human FAS in *E. coli***

Most of the recent kinetic and biochemical data was collected on rat FAS, expressed in *Spodoptera frugiperda* (*Sf-9*) insect cells in the Smith laboratory.<sup>2</sup> As we aimed at cheap and quick access to recombinant protein, we did not follow this strategy, but instead searched for expressible animal FAS constructs in *E. coli*. The initial focus was on human FAS (hFAS). hFAS is a member of the animal FAS family and hence suited to investigate the relationship to PKS. It also serves as a potential drug target due to its relevance in the therapy of several diseases.<sup>3,4</sup>

The project was initiated by cloning human FASN genes into bacterial expression plasmids. Two different genes were used, a synthetic, codon optimized gene (GeneArt, ThermoFisher) and a verified cDNA clone (Source BioScience). Both genes were cloned into a pET22b (Novagen) derived expression vector, generating a N-terminal StrepI-tag and a C-terminal His-tag (hFAS<sub>e</sub>, synthetic gene encoding human FAS; hFAS<sub>h</sub>, native sequence) (see Fig. S1A-C). Additionally, both genes were cloned into the vector pMAL-c5G (New England BioLabs) generating a N-terminal MBP-fusion and a C-terminal His-tag according to Jayakumar *et al.*<sup>5</sup> Contrary to Jayakumar's report, all attempts to express the human FAS in *E. coli* were either unsuccessful or yielded aggregated material, as also stated elsewhere.<sup>6</sup> Different expression strategies were tested; using different fusion constructs, *E. coli* cell lines, expression temperatures, concentration of inducer IPTG to different cell densities for induction.

#### A summary of expression is as following:

The first expression of four different constructs of hFAS<sub>e</sub> (N-terminal StrepI-tag, MBP-, Trx- and Sumo-fusion) in BL21-Gold (DE3) cells was analyzed via SDS-PAGE, performed on whole cells (see Fig. S2A). Every lane showed a faint band at the expected construct sizes (hFAS<sub>e</sub>: 278 kDa, MBP-hFAS<sub>e</sub>: 320 kDa; Trx-hFAS<sub>e</sub> 290 kDa; Sumo-hFAS<sub>e</sub> 287 kDa) indicating expression of full-length constructs. Interestingly, a second prominent band appeared at a slightly smaller construct size in all lanes indicating truncated protein. Since all different N-terminal fused constructs resulted in the same truncated protein it is clear that either a prominent proteolytic cleavage site or an alternative



translation start codon exists at the beginning of hFAS coding sequence. Indeed, a methionine at position 32 was identified with an appropriate strong translation initiation site. Two silent mutations in the alternative RBS abolished the production of truncated FAS (see Fig. S2A, right panel).

Based on the finding that *E. coli* is capable of translating the human FASN gene into a full-length polypeptide chain regardless of a N-terminal fusion, we then investigated whether hFAS is properly folded. Test-expressions in medium scale (50 mL) were performed to simultaneously screen the impact of different expression conditions. Cells were lysed mildly by lysozyme treatment in a stabilizing buffer, and the insoluble fraction was separated by centrifugation. Both fractions (inclusion bodies were dissolved in 8 M urea) were analyzed by SDS-PAGE. Unfortunately, most of the hFAS was expressed insolubly independent of the tested expression conditions. N-terminal fusion of MBP did not increase the fraction of soluble protein significantly (see Fig. S2B). Interestingly, the total amount of produced protein was dramatically increased by the MBP-fusion, but only when the plasmid pAR19 was used for expression (see Fig. S2B middle panel). This plasmid is based on the vector pMAL, which contains the whole regulatory region of *malE* under a TAC promoter. Furthermore, this plasmid does not have a N-terminal tag and directly starts with the *malE* sequence.

In order to increase the fraction of soluble protein, we tested several approaches. First, the improved *E. coli* BL21 strain BL21 Star (DE3) was used, which offers a better mRNA stability due to a mutation in the *rne131* gene. Additionally, the cell density at induction with IPTG was varied (see Fig. S2C). From the Coomassie-stained SDS-PAGE, it seems that expression in BL21 Star (DE3) cells resulted in a slightly increased soluble fraction, especially, when cells were induced at an OD<sub>600</sub> between 0.2-0.7. Again, a fusion with MBP did not increase the soluble fraction of protein.

A last attempt to obtain a soluble expression of hFAS in *E. coli* was tried by co-expression with molecular chaperones as they are known to assist the folding of polypeptide chains and the assembly of the macromolecule. Different chaperone systems were reported to facilitate heterologous expression of especially mammalian proteins in *E. coli*.<sup>7,8</sup> Indeed, a potential role of the human chaperonin TRiC/CCT was assigned to the folding process

of hFAS.<sup>9,10</sup> We decided to test a broad variety of chaperones from *E. coli*: Trigger factor (TF), DnaK-/DnaJ/GrpE, GroEL/GroES, ClpB and IbpA/IbpB plus chaperones of the thermophilic organism *Pyrococcus furiosus*: prefoldin (pfuPfdB), chaperonin (Cpn) and PF1883.

We decided to use the pETcoco system (Merck Biosciences) as co-expression vector, as it allows regulating copy number in the cell from low to medium copy. Every chaperone system consisting of more than one gene was organized polycistronically. In general, the 5' regulatory region of pET22b from the XbaI restriction site was used as translation initiation site between the genes. The effect of co-expression was again tested in 50 mL test cultures with subsequent separation of the soluble and insoluble fraction (see Fig. S3A and B).

Neither a chaperone system from *E. coli* nor from *P. furiosus* was able to prevent aggregation of hFAS. Hardly any beneficial effect on the fraction of soluble protein was observed. Only co-expression with TF seems to result in the appearance of small amounts of hFAS in the soluble fraction (see Fig. S3A). Though hFAS is one of the largest proteins in *E. coli* but we observed only 'thin' band(s) at ca. 171 kDa which may mean perhaps only a low amount of protein was loaded onto the gel. Therefore, it is difficult to draw a final conclusion, but a major effect of these chaperone systems on hFAS folding can be excluded.

Nevertheless, due to the appearance of small bands in the soluble fractions of our test expressions, we decided to test this expression on a larger scale. The scale of a bacterial culture may influence expression yields and also Jayakumar *et al.* used optimal conditions of a fermenter (15 L scale) to express hFAS.<sup>5,11</sup>

It can clearly be seen that MBP-hFAS is expressed in full-length in *E. coli* (see Fig. S4A-C). Comparing the lane with lysate to the supernatant shows a dramatic decrease of protein after centrifugation reflecting the expected high portion of insoluble protein. A supernatant fraction indicating soluble protein could not be purified by Ni-chelating affinity chromatography. This finding implies that either the C-terminal His-tag was inaccessible or that hFAS was unfolded, either as not expressed in its native conformation or denatured

during protein preparation. hFAS without a N-terminal fusion domain behaved similarly and again no beneficial effect of chaperone co-expression was seen.

## References

1. Luo H, Robb FT (2011) A modulator domain controlling thermal stability in the Group II chaperonins of Archaea. *Arch Biochem Biophys.* 512:111-118.
2. Joshi AK, Smith S (1993) Construction of a cDNA encoding the multifunctional animal fatty acid synthase and expression in *Spodoptera frugiperda* cells using baculoviral vectors. *Biochem J.* 296:143-149.
3. Ronnett GV, Kim E-K, Landree LE, Tu Y (2005) Fatty acid metabolism as a target for obesity treatment. *Physiol Behav.* 85:25-35.
4. Menendez JA, Vazquez-Martin A, Ortega FJ, Fernandez-Real JM (2009) Fatty Acid Synthase: Association with Insulin Resistance, Type 2 Diabetes, and Cancer. *Clin Chem.* 55:425-438.
5. Jayakumar A, Huang WY, Raetz B, Chirala SS, Wakil SJ (1996) Cloning and expression of the multifunctional human fatty acid synthase and its subdomains in *Escherichia coli*. *Proc Natl Acad Sci USA.* 93:14509-14514.
6. Pappenberger G, Benz J, Gsell B, Hennig M, Ruf A, Stihle M, Thoma R, Rudolph MG (2010) Structure of the Human Fatty Acid Synthase KS–MAT Didomain as a Framework for Inhibitor Design. *J Mol Biol.* 397:508-519.
7. Baneyx F, Mujacic M (2004) Recombinant protein folding and misfolding in *Escherichia coli*. *Nat Biotechnol.* 22:1399-1408.
8. Kolaj O, Spada S, Robin S, Wall JG (2009) Use of folding modulators to improve heterologous protein production in *Escherichia coli*. *Microb Cell Fact.* 8:9.
9. Yam AY, Xia Y, Lin H-TJ, Burlingame A, Gerstein M, Frydman J (2008) Defining the TRiC/CCT interactome links chaperonin function to stabilization of newly made proteins with complex topologies. *Nat Struct Mol Biol.* 15:1255-1262.
10. Růßmann F, Stemp MJ, Mönkemeyer L, Etchells SA, Bracher A, Hartl FU (2012) Folding of large multidomain proteins by partial encapsulation in the chaperonin TRiC/CCT. *Proc Natl Acad Sci USA.* 109:21208-21215.
11. Peti W, Page R (2007) Strategies to maximize heterologous protein expression in *Escherichia coli* with minimal cost. *Protein Expression Purif.* 51:1-10.
